# Supplementary material
Source: publisher site journal article supplement (https://www.dovepress.com/get_supplementary_file.php?f=245093.xlsx)
Supplement: Supplementary file 1 [file get_supplementary_file.php]

## Sheet: SupplementalTable1
Supplemental Table 1 Characteristics of Families 1-3.
Characteristic	Family 1	Family 2	Family 3
Tumor type in proband	Malignant ovarian teratoma	Neonatal sacrococcygeal teratoma, yolk sac tumor	Malignant testicular teratoma
Tumor type in family	Malignant ovarian teratoma	Malignancies, NOS	Malignancies, NOS
Other abnormalities	-----	Cornelia de Lange, sacral dermoid cyst	-----
Male	1	2	4
Female	3	9	3
# family members sequenced	4	11	7
-Affected
-unaffected	1	5	1
	3	6	6
Family members, not sequences, but affected	2	6	20
